Dissecting the clonality of I1 plasmids using ORF-based binarized structure network

analysis of plasmids (OSNAp)

Running title: Dissecting the clonality of I1 plasmids

Masahiro Suzuki<sup>1#</sup>, Chihiro Norizuki<sup>2</sup>, Jun-ichi Wachino<sup>3</sup>, Kumiko Kawamura<sup>2</sup>,

Noriyuki Nagano<sup>4</sup>, Yukiko Nagano<sup>4</sup>, Wataru Hayashi<sup>4</sup>, Kouji Kimura<sup>3</sup>, Yohei Doi<sup>1,5,6</sup>,

Yoshichika Arakawa<sup>3\*</sup>

<sup>1</sup> Department of Microbiology, Fujita Health University School of Medicine, Aichi,

Japan

<sup>2</sup> Department of Pathophysiological Laboratory Sciences, Nagoya University Graduate

School of Medicine, Aichi, Japan

<sup>3</sup> Department of Bacteriology, Nagoya University Graduate School of Medicine, Aichi,

Japan.

<sup>4</sup> Department of Medical Sciences, Shinshu University Graduate School of Medicine,

Science and Technology, Nagano, Japan.

<sup>5</sup> Department of Infectious Diseases, Fujita Health University School of Medicine,

19 Aichi, Japan

20 <sup>6</sup>Division of Infectious Diseases, University of Pittsburgh School of Medicine,

21 Pittsburgh, Pennsylvania, USA

22

23 #Address correspondence to Masahiro Suzuki, [masa-szk@fujita-hu.ac.jp](mailto:masa-szk@fujita-hu.ac.jp).

24 Dengakugakubo 98, Kutsu-kake-cho, Toyoake-shi, 470-1192, Aichi, Japan

25 Tel: +81-562-93-2433, Fax: +81-562-93-4003

26 \* Present address; Laboratory of Microbiology, Department of Medical Technology,

27 Faculty of Medical Sciences, Shubun University, Nikko-cho 6, Ichinomiya 491-0938,

28 Aichi, Japan

29

30

# 31 Abstract

32 Phylogenetic relationship of 97 I1 plasmids harboring *bla*<sub>CTX-M</sub> genes encoding  
 33 extended-spectrum beta-lactamase (ESBL) was analyzed using the ORF-based binarized  
 34 structure network analysis of plasmids (OSNAp). The majority of plasmids carrying  
 35 *bla*<sub>CTX-M-1</sub> or *bla*<sub>CTX-M-8</sub>, ESBL genes primarily associated with domestic animals, were  
 36 clonal. On the other hand, plasmids carrying *bla*<sub>CTX-M-14</sub> or *bla*<sub>CTX-M-15</sub>, identified from  
 37 both humans and domestic animals, were diverse in their contents. The findings suggest  
 38 that circulation of I1 plasmids among humans and animals may contribute to their  
 39 diversity.

40

## Introduction

Extended-spectrum  $\beta$ -lactamase (ESBL) genes, especially *bla*<sub>CTX-M</sub>, are widely disseminated among *Enterobacteriaceae* (1, 2). The *bla*<sub>CTX-M</sub> genes are found on plasmids of various incompatibility groups, such as F, I1, and others (3-9). Among them, *bla*<sub>CTX-M-15</sub> and *bla*<sub>CTX-M-14</sub> are the major ESBL genes present in *Enterobacteriaceae* from various hosts including humans and domestic animals (10-12). On the other hand, *bla*<sub>CTX-M-1</sub> and *bla*<sub>CTX-M-8</sub> are mainly found in *Enterobacteriaceae* from domestic animals (13-16). Phylogenetics of plasmids provide useful information on the dissemination pattern of resistance genes across various hosts. However, practical methods to compare lineages of multiple plasmids are yet to be established and validated.

We recently developed the ORF-based binarized structure network analysis of plasmids (OSNAp), a novel, digitalized approach in analyzing phylogeny of plasmids (17). With OSNAp, plasmids are converted to binary sequences based on their gene contents, and the relationship among plasmids is visualized by the neighbor-net network. The network is drawn using splits that separate plasmids into two groups based on distances between the binary sequences (Fig. 1).

In this study, we analyzed *bla*<sub>CTX-M</sub>-carrying I1 plasmids identified in *Enterobacteriaceae* collected from multiple hosts including humans and animals. I1

plasmids were selected in this proof of concept study since their structures are relatively conserved making them suitable for OSNAp (18).

## Materials and Methods

A total of 190 I1 plasmid sequences consisting of publicly available I1 plasmid sequences (17) and I1 plasmid sequences newly obtained for this study were included. As publicly available I1 plasmid sequences, 140 I1 plasmid sequence data registered in the NCBI genome database as of 4-Aug-2018 were used (Table 1) (17). Among these publicly available plasmid sequences, 47 had *bla*<sub>CTX-M</sub> genes (Table 3).

In addition, a total of 50 I1 plasmids containing *bla*<sub>CTX-M</sub> were identified in *Escherichia coli* strains isolated from humans, chicken meat, dog feces, and pig feces between 2010 to 2015. Their whole genomes were sequenced by MiSeq using QIAseq FX DNA Library Kit (Qiagen, Hulsterweg, Netherlands) and MiSeq Reagent Kit v3 600 cycles (Illumina, San Diego, CA). To enrich for sequence reads originating from plasmids, purified I1 plasmids were used as the templates for sequencing according to our previous study (8). MinION long-read sequencing was also performed according to our previous study (19). MiSeq and MinION reads were hybrid-assembled using Unicycler v. 0.4.9b, or Flye v. 2.7 and Pilon v. 1.23. Accession numbers of plasmids were listed in Table 2.

Plasmid sequence types (pSTs) of the plasmids were identified using the plasmid multilocus sequence typing (pMLST) web site (<https://pubmlst.org/plasmid/>). Subtypes of *bla*<sub>CTX-M</sub> genes were determined by ABRicate (<https://github.com/tseemann/abricate>) using the ResFinder database. Sequence types (STs) of the host cells were also identified using mlst command (<https://github.com/tseemann/mlst>). A total of 190 I1 plasmid sequences were analyzed by OSNAp under the relaxed condition (17). For the purpose of this analysis, ORFs having  $\geq 80\%$  sequence identity and sequence coverage were considered identical. Dice coefficient values between plasmids were also calculated. Plasmid regions (core, shell and cloud regions) were defined according to our previous study (17).

Clusters constituting the *bla*<sub>CTX-M</sub> plasmids were defined by splits which maximized the number of plasmids harboring the same *bla*<sub>CTX-M</sub> gene and minimized others. While clusters are identical to splits in the OSNAp analysis, the term cluster is used in this study for ease of reading. The diversity of plasmids within the same cluster was defined by the average of Dice indices.

I1 plasmid sequences were annotated using DFAST-core (<https://dfast.ddbj.nig.ac.jp/dfc/distribution/>) supplemented with allele-level annotation of *bla*<sub>CTX-M</sub> and IS genes using ResFinder

([https://bitbucket.org/genomicepidemiology/resfinder\\_db/src/master/](https://bitbucket.org/genomicepidemiology/resfinder_db/src/master/)) and ISfinder (<https://www-is.biotoul.fr/index.php>). Structures of modules carrying *bla*<sub>CTX-M</sub> genes and their locations were determined from annotation data of plasmid sequences by checking the regions surrounding *bla*<sub>CTX-M</sub>.

## Results

### OSNAp analysis.

Plasmids harboring the same *bla*<sub>CTX-M</sub> gene belonged to one or two clusters, and each plasmid cluster included the same *bla*<sub>CTX-M</sub>, except for one cluster which contained *bla*<sub>CTX-M-3</sub>, *bla*<sub>CTX-M-15</sub>, and *bla*<sub>CTX-M-55</sub>-harboring plasmids (Fig. 2).

Most (27/30) plasmids harboring *bla*<sub>CTX-M-1</sub> were classified into the same OSNAp cluster. The average Dice index of the *bla*<sub>CTX-M-1</sub> cluster was  $0.942 \pm 0.036$ . Most plasmids in the cluster belonged to pST3 except for 3 plasmids which were of pST108, pST7, and a pST7 variant lacking *sogS*.

All 15 plasmids harboring *bla*<sub>CTX-M-8</sub> were classified into the same cluster. Among them, 12 plasmids were similar with each other with an average Dice index of  $0.979 \pm 0.015$  and belonged to pST113. However, 3 plasmids belonging to pST114, pST132 and pST235 showed lower levels of similarity compared with the other 12 plasmids. The average Dice

index between the former 12 and the latter 3 plasmids was  $0.868 \pm 0.038$ .

Plasmids harboring *bla*<sub>CTX-M-15</sub> were classified into 2 major and 1 minor clusters, and one singleton. The cluster including 11 *bla*<sub>CTX-M-15</sub> plasmids showed an average Dice index of  $0.970 \pm 0.013$  and represented pST31. Another major cluster also included plasmids harboring *bla*<sub>CTX-M-3</sub> and *bla*<sub>CTX-M-55</sub> as well as *bla*<sub>CTX-M-15</sub>. The *bla*<sub>CTX-M-3</sub> and *bla*<sub>CTX-M-55</sub> modules showed structures specific to each *bla*<sub>CTX-M</sub> gene. The average Dice index of the cluster was  $0.967 \pm 0.016$ . All plasmids in this cluster belonged to pST16. The minor cluster was placed near the two major clusters in the OSNAp. Plasmids of the minor cluster belonged to pST37.

Unlike the other *bla*<sub>CTX-M</sub> genes, plasmids harboring *bla*<sub>CTX-M-14</sub> showed a polyclonal distribution. They were classified into 2 major and 1 minor clusters and a singleton. The largest cluster contained 10 plasmids with an average Dice index of  $0.950 \pm 0.049$ . Most plasmids in the largest cluster belonged to pST275.

# **Structure of modules carrying *bla*<sub>CTX-M</sub>.**

*bla*<sub>CTX-M-1</sub> was always carried on a module consisting of *ISEcp1*, *bla*<sub>CTX-M-1</sub>, and an ORF for a hypothetical protein. In 25 of the 27 plasmids, the *bla*<sub>CTX-M-1</sub> module was inserted between *rci* (encoding shufflon-specific DNA recombinase) and *pilVA* genes. In the remaining two plasmids, the *bla*<sub>CTX-M-1</sub> module was inserted into a cloud region. The



*bla*<sub>CTX-M-1</sub> module was inserted into *pilJ* in the three non-pST3 plasmids.

All *bla*<sub>CTX-M-8</sub> modules consisted of IS26,  $\Delta$ IS10, *bla*<sub>CTX-M-8</sub>, and IS26. The modules were inserted between *impB* and *yfbB* genes.

*bla*<sub>CTX-M-15</sub> plasmids of the major clusters had the same modules consisting of Tn2, *bla*<sub>CTX-M-15</sub>, *ISEcp1* and  $\Delta$ Tn2. Plasmids of the minor cluster belonged to pST37 and had another module consisting of *bla*<sub>CTX-M-15</sub> surrounded by IS26. The *bla*<sub>CTX-M-15</sub> modules were located in a cloud region of I1 plasmids.

*bla*<sub>CTX-M-14</sub> plasmids in the largest cluster had a closely related plasmid structure and their *bla*<sub>CTX-M-14</sub> modules consisted of *ISEcp1*, an ORF encoding a hypothetical protein, *bla*<sub>CTX-M-14</sub> and IS903. In 8 of 10 plasmids, the *bla*<sub>CTX-M-14</sub> module was integrated between *traH* and *traG* genes. The remaining 2 plasmids had the same *bla*<sub>CTX-M-14</sub> module, which was integrated in a cloud region. However, the *bla*<sub>CTX-M-14</sub> modules outside the largest cluster, including another major cluster consisting of pST80 plasmids, consisted of *ISEcp1*, *bla*<sub>CTX-M-14</sub>, and IS903. Some of the modules were interrupted by other IS elements or partial deletion. They were integrated into the cloud region.

**MLST of *E. coli* strains.** Most of the host *E. coli* strains belonged to diverse STs even when they harbored the same *bla*<sub>CTX-M</sub> genes (Table 2). Among them, 11 strains carrying *bla*<sub>CTX-M-1</sub> were classified into 7 STs and no strains carrying *bla*<sub>CTX-M-15</sub> or *bla*<sub>CTX-M-8</sub>

showed the same ST. However, strains with I1 plasmids carrying *bla*<sub>CTX-M-14</sub> gene were less diverse. In particular, 5 of 6 strains carrying pST275 and *bla*<sub>CTX-M-14</sub> gene belonged to ST131.

## Discussion

I1 plasmids are found in multiple host bacterial species but especially frequently in *Escherichia coli* and *Salmonella enterica*. Therefore, I1 plasmids may contribute to exchanging of antimicrobial resistant genes between these species. Moreover, I1 plasmids are capable of hosting multiple *bla*<sub>CTX-M</sub> variants (20). Plasmid structures of the I1 lineage are relatively well conserved, making them good targets of OSNAp, a novel approach in analyzing phylogeny of plasmids we developed recently.

Our data indicate that I1 plasmids harboring the same *bla*<sub>CTX-M</sub> genes generally spread clonally among different strains since they were classified into a limited number of OSNAp clusters whereas the host *E. coli* strains belonged to various STs. Our data support previous studies suggesting that I1 plasmids harboring the same *bla*<sub>CTX-M</sub> gene shared similar plasmid structures (8, 9, 21-23) .

The I1 plasmids harboring *bla*<sub>CTX-M</sub> could be divided into two major groups according to their similarity. One included plasmids harboring *bla*<sub>CTX-M-1</sub> and *bla*<sub>CTX-M-8</sub> which

showed clonal dissemination overall. The other included *bla*<sub>CTX-M-14</sub> and *bla*<sub>CTX-M-15</sub> plasmids which showed polyclonal dissemination consisting of two or more plasmid clones.

Interestingly, clonal plasmids carrying *bla*<sub>CTX-M</sub> genes are largely restricted to animals (6, 8, 22, 24). Moreover, *bla*<sub>CTX-M</sub> genes in this group are mainly associated with I1 plasmids (6, 8, 22, 25, 26), and not reported from F plasmids which are the dominant plasmid type overall in *E. coli*. Therefore, *bla*<sub>CTX-M</sub> genes of this group may seldom exchange *bla*<sub>CTX-M</sub> genes with other plasmids. Moreover, I1 plasmids harboring them appear to spread in *E. coli* in conjunction with international trade of meat products (27).

On the other hand, *bla*<sub>CTX-M</sub> genes such as *bla*<sub>CTX-M-14</sub> or *bla*<sub>CTX-M-15</sub> were detected from various sources including humans and domestic animals. Moreover, *bla*<sub>CTX-M</sub> genes in this group were frequently found on F plasmids in addition to I1 plasmids (3, 5, 7, 28, 29). This suggests that these *bla*<sub>CTX-M</sub> genes may have transmitted between I1 and F plasmids. Adaptation to a variety of host animals and plasmids may contribute to the extensive spread of this group of *bla*<sub>CTX-M</sub> genes.

In this study, we analyzed I1 plasmids as proof of concept because of their relative structural simplicity. However, F plasmids are the most common plasmid type especially carrying *bla*<sub>CTX-M-14</sub> and *bla*<sub>CTX-M-15</sub> genes, which are the dominant ESBL genes (28, 29).

The phylogeny of F plasmids is complex due to their extensive structural diversity (19, 28, 30). Phylogenetic analysis of F plasmids will therefore be challenging and may require adjustments to OSNAp such as analyzing subgroups of plasmids based on the similarity of gene contents.

In summary, I1 plasmids harboring *bla*<sub>CTX-M</sub> genes have disseminated clonally, and the diversity of plasmid gene contents harboring the same *bla*<sub>CTX-M</sub> subtypes may depend on their occurrence and history of their spread. I1 plasmids carrying *bla*<sub>CTX-M-1</sub> or *bla*<sub>CTX-M-8</sub>, which are known to spread by the global meat supply chain, showed clonal phylogeny. On the other hand, *bla*<sub>CTX-M-14</sub> and *bla*<sub>CTX-M-15</sub> showed polyclonal phylogeny. In particular, the latter *bla*<sub>CTX-M</sub> genes are frequently reported on F plasmids (3, 5, 7, 28, 29), and it can be hypothesized that their ability to integrate into various plasmids may have contributed to their success in becoming predominant *bla*<sub>CTX-M</sub> genes. The ability to integrate into various plasmids is also considered to be an important factor underpinning successful spread of certain drug resistance genes. Circulation among human and animals may help diversification of plasmids carrying *bla*<sub>CTX-M</sub> genes.

## Acknowledgements

This study was supported by grants from the Food Safety Commission, Cabinet Office,

Government of Japan (Research Program for Risk Assessment Study on Food Safety, no. 1504), JSPS KAKENHI Grant Number JP20K10457, and AMED under Grant Number JP20fk0108061.

## References

1. Kawamura K, Nagano N, Suzuki M, Wachino JI, Kimura K, Arakawa Y. 2017. ESBL-producing *Escherichia coli* and Its Rapid Rise among Healthy People. Food Saf (Tokyo) 5:122-150.
2. Zhao WH, Hu ZQ. 2013. Epidemiology and genetics of CTX-M extended-spectrum b-lactamases in Gram-negative bacteria. Crit Rev Microbiol 39:79-101.
3. Birgy A, Levy C, Nicolas-Chanoine MH, Cointe A, Hobson CA, Magnan M, Bechet S, Bidet P, Cohen R, Bonacorsi S. 2019. Independent Host Factors and Bacterial Genetic Determinants of the Emergence and Dominance of *Escherichia coli* Sequence Type 131 CTX-M-27 in a Community Pediatric Cohort Study. Antimicrob Agents Chemother 63.
4. Djeghout B, Saha S, Sajib MSI, Tanmoy AM, Islam M, Kay GL, Langridge GC, Endtz HP, Wain J, Saha SK. 2018. Ceftriaxone-resistant *Salmonella* Typhi carries an IncII-ST31 plasmid encoding CTX-M-15. J Med Microbiol 67:620-627.

- 221 5. Guiral E, Pons MJ, Vubil D, Mari-Almirall M, Sigauque B, Soto SM, Alonso PL,  
222 Ruiz J, Vila J, Mandomando I. 2018. Epidemiology and molecular  
223 characterization of multidrug-resistant *Escherichia coli* isolates harboring *bla*<sub>CTX-M</sub>  
224 <sub>M</sub> group 1 extended-spectrum b-lactamases causing bacteremia and urinary tract  
225 infection in Manhica, Mozambique. Infect Drug Resist 11:927-936.
- 226 6. Irrgang A, Hammerl JA, Falgenhauer L, Guiral E, Schmoger S, Imirzalioglu C,  
227 Fischer J, Guerra B, Chakraborty T, Kasbohrer A. 2018. Diversity of CTX-M-1-  
228 producing *E. coli* from German food samples and genetic diversity of the *bla*<sub>CTX-M-1</sub>  
229 <sub>M-1</sub> region on IncI1 ST3 plasmids. Vet Microbiol 221:98-104.
- 230 7. Kanamori H, Parobek CM, Juliano JJ, Johnson JR, Johnston BD, Johnson TJ,  
231 Weber DJ, Rutala WA, Anderson DJ. 2017. Genomic Analysis of Multidrug-  
232 Resistant *Escherichia coli* from North Carolina Community Hospitals: Ongoing  
233 Circulation of CTX-M-Producing ST131-H30Rx and ST131-H30R1 Strains.  
234 Antimicrob Agents Chemother 61:e00912-17.
- 235 8. Norizuki C, Wachino JI, Suzuki M, Kawamura K, Nagano N, Kimura K, Arakawa  
236 Y. 2017. Specific *bla*<sub>CTX-M-8</sub>/IncI1 Plasmid Transfer among Genetically Diverse  
237 *Escherichia coli* Isolates between Humans and Chickens. Antimicrob Agents  
238 Chemother 61:e00663-17.

- 239 9. Valcek A, Roer L, Overballe-Petersen S, Hansen F, Bortolaia V,  
240 Leekitcharoenphon P, Korsgaard HB, Seyfarth AM, Hendriksen RS, Hasman H,  
241 Hammerum AM. 2019. IncII ST3 and IncII ST7 plasmids from CTX-M-1-  
242 producing *Escherichia coli* obtained from patients with bloodstream infections  
243 are closely related to plasmids from *E. coli* of animal origin. J Antimicrob  
244 Chemother 74:2171-2175.
- 245 10. Hayashi W, Ohsaki Y, Taniguchi Y, Koide S, Kawamura K, Suzuki M, Kimura K,  
246 Wachino JI, Nagano Y, Arakawa Y, Nagano N. 2018. High prevalence of *bla*<sub>CTX-M-14</sub>  
247 among genetically diverse *Escherichia coli* recovered from retail raw chicken  
248 meat portions in Japan. Int J Food Microbiol 284:98-104.
- 249 11. Ho PL, Lo WU, Yeung MK, Li Z, Chan J, Chow KH, Yam WC, Tong AH, Bao  
250 JY, Lin CH, Lok S, Chiu SS. 2012. Dissemination of pHK01-like incompatibility  
251 group IncFII plasmids encoding CTX-M-14 in *Escherichia coli* from human and  
252 animal sources. Vet Microbiol 158:172-9.
- 253 12. Irrgang A, Falgenhauer L, Fischer J, Ghosh H, Guiral E, Guerra B, Schmoger S,  
254 Imirzalioglu C, Chakraborty T, Hammerl JA, Käsbohrer A. 2017. CTX-M-15-  
255 Producing *E. coli* Isolates from Food Products in Germany Are Mainly Associated  
256 with an IncF-Type Plasmid and Belong to Two Predominant Clonal *E. coli*

257 Lineages. Front Microbiol 8:2318.

258 13. Cormier A, Zhang PLC, Chalmers G, Weese JS, Deckert A, Mulvey M, McAllister  
259 T, Boerlin P. 2019. Diversity of CTX-M-positive *Escherichia coli* recovered from  
260 animals in Canada. Vet Microbiol 231:71-75.

261 14. Kawamura K, Goto K, Nakane K, Arakawa Y. 2014. Molecular epidemiology of  
262 extended-spectrum  $\beta$ -lactamases and *Escherichia coli* isolated from retail foods  
263 including chicken meat in Japan. Foodborne Pathog Dis 11:104-10.

264 15. Kim S, Sung JY, Cho HH, Kwon KC, Koo SH. 2014. Characterization of CTX-  
265 M-14- and CTX-M-15-Producing *Escherichia coli* and *Klebsiella pneumoniae*  
266 Isolates from Urine Specimens in a Tertiary-Care Hospital. J Microbiol  
267 Biotechnol 24:765-70.

268 16. Nahar A, Awasthi SP, Hatanaka N, Okuno K, Hoang PH, Hassan J, Hinenoya A,  
269 Yamasaki S. 2018. Prevalence and characteristics of extended-spectrum  $\beta$ -  
270 lactamase-producing *Escherichia coli* in domestic and imported chicken meats in  
271 Japan. J Vet Med Sci 80:510-517.

272 17. Suzuki M, Doi Y, Arakawa Y. 2020. ORF-based binarized structure network  
273 analysis of plasmids (OSNAp), a novel approach to core gene-independent  
274 plasmid phylogeny. Plasmid 108:102477.



- 275 18. Carattoli A, Villa L, Fortini D, Garcia-Fernandez A. 2018. Contemporary IncI1  
276 plasmids involved in the transmission and spread of antimicrobial resistance in  
277 Enterobacteriaceae. Plasmid doi:10.1016/j.plasmid.2018.12.001.
- 278 19. Matsuo N, Nonogaki R, Hayashi M, Wachino JI, Suzuki M, Arakawa Y,  
279 Kawamura K. 2020. Characterization of *bla*<sub>CTX-M-27</sub>/F1:A2:B20 Plasmids  
280 Harbored by *Escherichia coli* Sequence Type 131 Sublineage C1/H30R Isolates  
281 Spreading among Elderly Japanese in Nonacute-Care Settings. Antimicrob  
282 Agents Chemother 64.
- 283 20. Wong MH, Kan B, Chan EW, Yan M, Chen S. 2016. IncI1 Plasmids Carrying  
284 Various *bla*<sub>CTX-M</sub> Genes Contribute to Ceftriaxone Resistance in *Salmonella*  
285 *enterica* Seroovar Enteritidis in China. Antimicrob Agents Chemother 60:982-9.
- 286 21. Mo SS, Telke AA, Osei KO, Sekse C, Slettemeas JS, Urdahl AM, Ilag HK,  
287 Leangapichart T, Sunde M. 2020. *bla*<sub>CTX-M-1</sub>/IncI1-Ig Plasmids Circulating in  
288 *Escherichia coli* From Norwegian Broiler Production Are Related, but  
289 Distinguishable. Front Microbiol 11:333.
- 290 22. Palmeira JD, Haenni M, Metayer V, Madec JY, Ferreira HMN. 2020. Epidemic  
291 spread of IncI1/pST113 plasmid carrying the Extended-Spectrum b-Lactamase  
292 (ESBL) *bla*<sub>CTX-M-8</sub> gene in *Escherichia coli* of Brazilian cattle. Vet Microbiol

243:108629.

23. Chen J, Chen S, Jiang Y, Zhang R, Cai J. 2021. Fecal Carriage and Genetic Characterization of CTX-M-1/9/1-Producing *Escherichia coli* From Healthy Humans in Hangzhou, China. *Front Microbiol* 12:616687.

24. Gundran RS, Cardenio PA, Villanueva MA, Sison FB, Benigno CC, Kreausukon K, Pichpol D, Punyapornwithaya V. 2019. Prevalence and distribution of *bla*<sub>CTX-M</sub>, *bla*<sub>SHV</sub>, *bla*<sub>TEM</sub> genes in extended- spectrum  $\beta$ - lactamase- producing *E. coli* isolates from broiler farms in the Philippines. *BMC Vet Res* 15:227.

25. Cunha MPV, Oliveira MCV, Oliveira MGX, Menão MC, Knöbl T. 2019. CTX-M-producing *Escherichia coli* Isolated from urban pigeons (*Columba livia domestica*) in Brazil. *J Infect Dev Ctries* 13:1052-1056.

26. Dahmen S, Haenni M, Madec J-Y. 2012. IncI1/ST3 plasmids contribute to the dissemination of the *bla*<sub>CTX-M-1</sub> gene in *Escherichia coli* from several animal species in France. *Journal of Antimicrobial Chemotherapy* 67:3011-3012.

27. Warren RE, Ensor VM, O'Neill P, Butler V, Taylor J, Nye K, Harvey M, Livermore DM, Woodford N, Hawkey PM. 2008. Imported chicken meat as a potential source of quinolone-resistant *Escherichia coli* producing extended-spectrum  $\beta$ -lactamases in the UK. *J Antimicrob Chemother* 61:504-8.

- 311 28. Mahéroult AC, Kemble H, Magnan M, Gachet B, Roche D, Le Nagard H,  
312 Tenaillon O, Denamur E, Branger C, Landraud L. 2019. Advantage of the  
313 F2:A1:B- IncF Pandemic Plasmid over IncC Plasmids in In Vitro Acquisition and  
314 Evolution of *bla*<sub>CTX-M</sub> Gene-Bearing Plasmids in *Escherichia coli*. Antimicrob  
315 Agents Chemother 63.
- 316 29. Marcadé G, Deschamps C, Boyd A, Gautier V, Picard B, Branger C, Denamur E,  
317 Arlet G. 2009. Replicon typing of plasmids in *Escherichia coli* producing  
318 extended-spectrum beta-lactamases. J Antimicrob Chemother 63:67-71.
- 319 30. Li JJ, Spychala CN, Hu F, Sheng JF, Doi Y. 2015. Complete nucleotide sequences  
320 of *bla*<sub>CTX-M</sub>-harboring IncF plasmids from community-associated *Escherichia coli*  
321 strains in the United States. Antimicrob Agents Chemother 59:3002-7.
- 322
- 323

## Figure legend

### Figure 1

Outline of OSNAp analysis. Plasmid sequences (p1 – p3) are broken down into ORFs (1 – 8) and binarized based on the presence of ORFs. Phylogenetic relationships among plasmids are depicted as neighbor-net network based on the distance matrix of the binary sequences. ORF contents of plasmid 4 to 8 (p4 – p8) are omitted.

### Figure 2

OSNAp analysis of 11 plasmids. Plasmids harboring *bla*<sub>CTX-M-8</sub> were classified into single cluster and most *bla*<sub>CTX-M-1</sub> harboring plasmids also belonged to a cluster. On the other hand, plasmids harboring *bla*<sub>CTX-M-14</sub> and *bla*<sub>CTX-M-15</sub> were classified into multiple clusters. Representative pST is shown for each cluster.

Table 1. 11 plasmids obtained from NCBI database

| No. | Accession No. | Species                    | Plasmid                     |
|-----|---------------|----------------------------|-----------------------------|
| 1   | AP005147.1    | <i>Salmonella enterica</i> | R64                         |
| 2   | AP011954.1    | <i>Salmonella enterica</i> | R621a                       |
| 3   | AB021078.1    | <i>Shigella sonnei</i>     | ColIb-P9                    |
| 4   | CP001118.1    | <i>Salmonella enterica</i> | pSL476_91                   |
| 5   | CP009566.1    | <i>Salmonella enterica</i> | 22462_pCVM22462             |
| 6   | CP012929.1    | <i>Salmonella enterica</i> | p12-4374_96                 |
| 7   | CP018104.1    | <i>Escherichia coli</i>    | pMR0716_tem1                |
| 8   | CP019207.1    | <i>Salmonella enterica</i> | pCFSAN004174                |
| 9   | CP019215.2    | <i>Escherichia coli</i>    | pI1_WCHEC050613             |
| 10  | CP023370.1    | <i>Escherichia coli</i>    | p96                         |
| 11  | CP027415.1    | <i>Salmonella enterica</i> | 320_unnamed1                |
| 12  | CP004087.1    | <i>Salmonella enterica</i> | pSEEH1578_1                 |
| 13  | CP013224.1    | <i>Salmonella enterica</i> | PDM04                       |
| 14  | CP013221.1    | <i>Salmonella enterica</i> | PDM02                       |
| 15  | CP027409.1    | <i>Salmonella enterica</i> | 317_unnamed                 |
| 16  | CP005389.2    | <i>Salmonella enterica</i> | pCFSAN002069_1              |
| 17  | CP014662.1    | <i>Salmonella enterica</i> | pSAN1-2010K-2577            |
| 18  | CP016585.1    | <i>Salmonella enterica</i> | pSH14-009_99                |
| 19  | CP018625.1    | <i>Escherichia coli</i>    | 44_pFORC44_1                |
| 20  | CP015996.1    | <i>Escherichia coli</i>    | pS51_1                      |
| 21  | CP002489.1    | <i>Salmonella enterica</i> | TY474p2                     |
| 22  | HE654725.1    | <i>Salmonella enterica</i> | pCol1B9_SL1344              |
| 23  | CP027127.1    | <i>Escherichia coli</i>    | 374_unnamed2                |
| 24  | CP022064.2    | <i>Salmonella enterica</i> | 312_unnamed4                |
| 25  | CP016865.1    | <i>Salmonella enterica</i> | 2010K-1587_pSTY2-2010K-1587 |
| 26  | CP016522.1    | <i>Salmonella enterica</i> | pSA02DT09004001_101         |
| 27  | CP012923.1    | <i>Salmonella enterica</i> | pSA02DT10168701_99          |
| 28  | CP016516.1    | <i>Salmonella enterica</i> | p11-004736-1-7_99           |
| 29  | CP016568.1    | <i>Salmonella enterica</i> | pAMR588-04-00318_99         |
| 30  | CP012936.1    | <i>Salmonella enterica</i> | pN13-01290_98               |
| 31  | CP016572.1    | <i>Salmonella enterica</i> | pAMR588-04-00320_99         |
| 32  | CP024854.1    | <i>Escherichia coli</i>    | 6_tig00000311               |
| 33  | CP023385.1    | <i>Escherichia coli</i>    | p87                         |

|    |            |                            |                    |
|----|------------|----------------------------|--------------------|
| 34 | CP023356.1 | <i>Escherichia coli</i>    | p95                |
| 35 | CP023376.1 | <i>Escherichia coli</i>    | p92                |
| 36 | CP023365.1 | <i>Escherichia coli</i>    | p92                |
| 37 | CP016533.1 | <i>Salmonella enterica</i> | pSA01AB09084001_92 |
| 38 | CP023382.1 | <i>Escherichia coli</i>    | p95                |
| 39 | CP021208.1 | <i>Escherichia coli</i>    | Z247_p2474-3       |
| 40 | CP026726.1 | <i>Escherichia coli</i>    | 2_p266917_2_3      |
| 41 | CP023362.1 | <i>Escherichia coli</i>    | p85                |
| 42 | CP010142.1 | <i>Escherichia coli</i>    | B                  |
| 43 | CP018975.1 | <i>Escherichia coli</i>    | 545_pEC545_1       |
| 44 | CP023534.1 | <i>Escherichia coli</i>    | 403_unnamed1       |
| 45 | CP003290.1 | <i>Escherichia coli</i>    | pESBL-EA11         |
| 46 | CP025339.1 | <i>Salmonella enterica</i> | p113k              |
| 47 | CP021845.1 | <i>Escherichia coli</i>    | pEC1515-1          |
| 48 | CP021841.1 | <i>Escherichia coli</i>    | pEC974-1           |
| 49 | CP019173.1 | <i>Salmonella enterica</i> | pCFSAN004175       |
| 50 | CP019205.1 | <i>Salmonella enterica</i> | pCFSAN004173       |
| 51 | CP002186.1 | <i>Escherichia coli</i>    | pRK1               |
| 52 | CP002517.1 | <i>Escherichia coli</i>    | pEKO1101           |
| 53 | LN890525.1 | <i>Salmonella enterica</i> | 2                  |
| 54 | CP024152.1 | <i>Escherichia coli</i>    | p14EC033e          |
| 55 | CP018110.1 | <i>Escherichia coli</i>    | pMRSN346595_1203   |
| 56 | CP018122.1 | <i>Escherichia coli</i>    | pMRSN346355_1203   |
| 57 | CP018116.1 | <i>Escherichia coli</i>    | pMRSN346638_1193   |
| 58 | CP006641.1 | <i>Escherichia coli</i>    | PCN061p5           |
| 59 | CP027535.1 | <i>Escherichia coli</i>    | 81_unnamed1        |
| 60 | CP016520.1 | <i>Salmonella enterica</i> | pCE-R2-11-0435_92  |
| 61 | CP012627.1 | <i>Escherichia coli</i>    | pSF-468-2          |
| 62 | CP024292.1 | <i>Escherichia coli</i>    | unnamed3           |
| 63 | CP018946.1 | <i>Escherichia coli</i>    | 224_pEC224_2       |
| 64 | CP014494.1 | <i>Escherichia coli</i>    | pMVASt0167_2       |
| 65 | LT838199.1 | <i>Escherichia coli</i>    | isolate_pWI1-incI1 |
| 66 | CP024146.1 | <i>Escherichia coli</i>    | p14EC029e          |
| 67 | CP002731.1 | <i>Escherichia coli</i>    | pUMNK88_91         |
| 68 | CP010317.1 | <i>Escherichia coli</i>    | pAPEC-O78-2        |

|     |            |                              |                       |
|-----|------------|------------------------------|-----------------------|
| 69  | CP015916.1 | <i>Escherichia coli</i>      | pSLy4                 |
| 70  | CP010130.1 | <i>Escherichia coli</i>      | A                     |
| 71  | CP018993.1 | <i>Escherichia coli</i>      | AZ147_pECAZ147_2      |
| 72  | CP010233.1 | <i>Escherichia coli</i>      | B                     |
| 73  | AP009241.1 | <i>Escherichia coli</i>      | pSE11-1               |
| 74  | CP024822.1 | <i>Escherichia coli</i>      | pCREC-591_1           |
| 75  | CP025751.1 | <i>Escherichia coli</i>      | pCV839-06-p1          |
| 76  | CP014622.1 | <i>Salmonella enterica</i>   | pSAN1-1727            |
| 77  | CP014972.2 | <i>Salmonella enterica</i>   | pSTY1-1898            |
| 78  | CP016387.1 | <i>Salmonella enterica</i>   | p931IncI1             |
| 79  | CP018638.1 | <i>Salmonella enterica</i>   | pSE69-3861-1          |
| 80  | CP019905.1 | <i>Escherichia coli</i>      | 56_unnamed6           |
| 81  | CP021882.1 | <i>Escherichia coli</i>      | 137_tig00001287_pilon |
| 82  | CP027135.1 | <i>Escherichia coli</i>      | 369_unnamed3          |
| 83  | CP024918.1 | <i>Klebsiella pneumoniae</i> | pKPNH542              |
| 84  | CP015161.1 | <i>Escherichia coli</i>      | pECO-93a              |
| 85  | CP020494.1 | <i>Salmonella enterica</i>   | pSE08-00436-2         |
| 86  | CP012835.1 | <i>Salmonella enterica</i>   | pCFSAN001588_2        |
| 87  | CP013193.1 | <i>Escherichia coli</i>      | 31_pFORC313           |
| 88  | CP000797.1 | <i>Escherichia coli</i>      | pETEC_73              |
| 89  | CP023350.1 | <i>Escherichia coli</i>      | unnamed1              |
| 90  | CP024241.1 | <i>Escherichia coli</i>      | unnamed1              |
| 91  | CP023352.1 | <i>Escherichia coli</i>      | unnamed3              |
| 92  | CP019220.1 | <i>Klebsiella pneumoniae</i> | pKp1756               |
| 93  | CP021739.1 | <i>Escherichia coli</i>      | 150_tig00002897alt    |
| 94  | CP021693.1 | <i>Escherichia coli</i>      | 151_tig00001252       |
| 95  | CP021533.1 | <i>Escherichia coli</i>      | 149_tig00000220       |
| 96  | CP023957.1 | <i>Escherichia coli</i>      | 448_unnamed3          |
| 97  | CP015838.1 | <i>Escherichia coli</i>      | pMS6198D              |
| 98  | CP023900.1 | <i>Escherichia coli</i>      | 433_unnamed6          |
| 99  | CP024233.1 | <i>Escherichia coli</i>      | unnamed1              |
| 100 | CP024270.1 | <i>Escherichia coli</i>      | unnamed1              |
| 101 | CP024253.1 | <i>Escherichia coli</i>      | unnamed4              |
| 102 | CP008736.1 | <i>Escherichia coli</i>      | pESBL-283             |
| 103 | CP008737.1 | <i>Escherichia coli</i>      | pESBL-305             |

|     |            |                              |                  |
|-----|------------|------------------------------|------------------|
| 104 | CP008738.1 | <i>Escherichia coli</i>      | pESBL-315        |
| 105 | KT779550.1 | <i>Escherichia coli</i>      | p369             |
| 106 | KF787110.1 | <i>Escherichia coli</i>      | pIFM3804         |
| 107 | KJ484638.1 | <i>Escherichia coli</i>      | pC49-108         |
| 108 | KJ484637.1 | <i>Escherichia coli</i>      | pC59-112         |
| 109 | KJ484635.1 | <i>Escherichia coli</i>      | pC60-108         |
| 110 | KM052220.1 | <i>Escherichia coli</i>      | pH18-Hel20-TF1   |
| 111 | KJ484630.1 | <i>Escherichia coli</i>      | pH1519-88        |
| 112 | KJ484629.1 | <i>Escherichia coli</i>      | pH2291-112       |
| 113 | KM377238.1 | <i>Escherichia coli</i>      | pHV114           |
| 114 | KM377239.1 | <i>Escherichia coli</i>      | pHV292           |
| 115 | KM377240.1 | <i>Escherichia coli</i>      | pHV295           |
| 116 | CP007651.1 | <i>Escherichia coli</i>      | pTCN40607        |
| 117 | MF152729.1 | <i>Escherichia coli</i>      | pCTXM1-MU2       |
| 118 | KJ563250.1 | <i>Escherichia coli</i>      | pTF2             |
| 119 | EU935740.1 | <i>Escherichia coli</i>      | pEK204           |
| 120 | CP008735.1 | <i>Escherichia coli</i>      | pESBL-12         |
| 121 | GU371927.1 | <i>Escherichia coli</i>      | pEC-Bactec       |
| 122 | KU355874.1 | <i>Escherichia coli</i>      | pFAM22871-2      |
| 123 | HE610900.2 | <i>Escherichia coli</i>      | pHUSEC2011-1     |
| 124 | KJ406378.1 | <i>Shigella sonnei</i>       | pSH4469          |
| 125 | MK238490.1 | <i>Salmonella enterica</i>   | pSPA440915       |
| 126 | KJ866866.1 | <i>Escherichia coli</i>      | pSKLX3330        |
| 127 | KP987217.1 | <i>Klebsiella pneumoniae</i> | p628-CTXM        |
| 128 | LM651376.1 | <i>Escherichia coli</i>      | pV404            |
| 129 | MH674341.1 | <i>Escherichia coli</i>      | pUR-EC07         |
| 130 | LN735558.1 | <i>Escherichia coli</i>      | pC193            |
| 131 | LN735561.1 | <i>Escherichia coli</i>      | pC271            |
| 132 | KT282968.1 | <i>Escherichia coli</i>      | pEC012           |
| 133 | LN735559.1 | <i>Escherichia coli</i>      | pM105            |
| 134 | LN735560.1 | <i>Escherichia coli</i>      | pV408            |
| 135 | CM007643.1 | <i>Escherichia coli</i>      | pEC1333          |
| 136 | KY964068.1 | <i>Escherichia coli</i>      | pLV23529-CTX-M-8 |
| 137 | AP017892.1 | <i>Escherichia coli</i>      | pN23             |
| 138 | AP017893.1 | <i>Escherichia coli</i>      | pS11             |



|     |            |                         |          |
|-----|------------|-------------------------|----------|
| 139 | KJ125070.2 | <i>Escherichia coli</i> | pHNAH4-1 |
| 140 | KP198616.1 | <i>Escherichia coli</i> | pCTXM123 |

---

Table 2. 11 plasmids analyzed in this study

| Plasmid |         |           |                                        |        | Host <i>E. coli</i> strain |         |                     |      |               |
|---------|---------|-----------|----------------------------------------|--------|----------------------------|---------|---------------------|------|---------------|
| No.     | Plasmid |           | <i>bla</i> <sub>CTX-M</sub><br>subtype | pMLST  | Strain                     | ST      | Source              | Year | Accession No. |
|         | name    | Size (bp) |                                        |        |                            |         |                     |      |               |
| 141     | p15A37  | 106153    | CTX-M-1                                | pST318 | 15A37                      | ST48    | <i>Homo sapiens</i> | 2015 | LC567050      |
| 142     | pS12-1  | 105327    | CTX-M-1                                | pST3   | S12-1                      | ST1582  | Chicken meat        | 2015 | LC567056      |
| 143     | pS40-2  | 104027    | CTX-M-1                                | pST3   | S40-2                      | ST117   | Chicken meat        | 2015 | LC567057      |
| 144     | pS43-1  | 108830    | CTX-M-1                                | pST3   | S43-1                      | ST1684  | Chicken meat        | 2015 | LC567058      |
| 145     | pS83-1  | 106223    | CTX-M-1                                | pST3   | S83-1                      | ST117   | Chicken meat        | 2015 | LC567060      |
| 146     | pN603   | 109957    | CTX-M-1                                | pST3   | N603                       | ST117   | <i>Homo sapiens</i> | 2010 | LC567083      |
| 147     | pS13    | 109827    | CTX-M-1                                | pST3   | S13                        | ST155   | Chicken meat        | 2010 | LC567084      |
| 148     | pS74    | 108158    | CTX-M-1                                | pST3   | S74                        | ST155   | Chicken meat        | 2010 | LC567090      |
| 149     | pS124   | 113140    | CTX-M-1                                | pST3   | S124                       | ST1594  | Chicken meat        | 2010 | LC567093      |
| 150     | pS127   | 107498    | CTX-M-1                                | pST3   | S127                       | ST1594  | Chicken meat        | 2010 | LC567094      |
| 151     | pS292   | 114151    | CTX-M-1                                | pST3   | S292                       | ST2491  | Chicken meat        | 2010 | LC567097      |
| 152     | pP16-1  | 91143     | CTX-M-15                               | pST31  | P16-1                      | ST1011  | <i>Sus scrofa</i>   | 2015 | LC567054      |
| 153     | pN367   | 87540     | CTX-M-15                               | pST31  | N367                       | ST349   | <i>Homo sapiens</i> | 2010 | LC567068      |
| 154     | pN441   | 88536     | CTX-M-15                               | pST31  | N441                       | ST11218 | <i>Homo sapiens</i> | 2010 | LC567071      |
| 155     | pN600   | 91115     | CTX-M-15                               | pST16  | N600                       | ST3524  | <i>Homo sapiens</i> | 2010 | LC567081      |
| 156     | pN601   | 91134     | CTX-M-15                               | pST16  | N601                       | ST1193  | <i>Homo sapiens</i> | 2010 | LC567082      |
| 157     | pS68    | 93395     | CTX-M-15                               | pST31  | S68                        | ST57    | Chicken meat        | 2010 | LC567089      |
| 158     | pS122   | 86016     | CTX-M-15                               | pST323 | S122                       | ST88    | Chicken meat        | 2010 | LC567092      |

|     |         |        |          |        |        |         |                     |      |          |
|-----|---------|--------|----------|--------|--------|---------|---------------------|------|----------|
| 159 | pS261   | 88544  | CTX-M-15 | pST31  | S261   | ST93    | Chicken meat        | 2010 | LC567096 |
| 160 | pN83    | 86191  | CTX-M-55 | pST16  | N83    | ST6756  | <i>Homo sapiens</i> | 2010 | LC567063 |
| 161 | pN126   | 86191  | CTX-M-55 | pST16  | N126   | ST6756  | <i>Homo sapiens</i> | 2010 | LC567065 |
| 162 | p15A44  | 116105 | CTX-M-14 | pST80  | 15A44  | ST156   | <i>Homo sapiens</i> | 2015 | LC567051 |
| 163 | p15A63  | 99602  | CTX-M-14 | pST80  | 15A63  | ST410   | <i>Homo sapiens</i> | 2015 | LC567052 |
| 164 | pP819-1 | 92584  | CTX-M-14 | pST319 | P819-1 | ST410   | <i>Sus scrofa</i>   | 2015 | LC567055 |
| 165 | pS62-1  | 97933  | CTX-M-14 | pST320 | S62-1  | ST162   | Chicken meat        | 2015 | LC567059 |
| 166 | pS84-3  | 112637 | CTX-M-14 | pST162 | S84-3  | ST162   | Chicken meat        | 2015 | LC567061 |
| 167 | pN11    | 87299  | CTX-M-14 | pST275 | N11    | ST131   | <i>Homo sapiens</i> | 2010 | LC567062 |
| 168 | pN270   | 87298  | CTX-M-14 | pST275 | N270   | ST131   | <i>Homo sapiens</i> | 2010 | LC567066 |
| 169 | pN333   | 87299  | CTX-M-14 | pST275 | N333   | ST131   | <i>Homo sapiens</i> | 2010 | LC567067 |
| 170 | pN410   | 87299  | CTX-M-14 | pST275 | N410   | ST131   | <i>Homo sapiens</i> | 2010 | LC567070 |
| 171 | pN537   | 101264 | CTX-M-14 | pST321 | N537   | ST156   | <i>Homo sapiens</i> | 2010 | LC567074 |
| 172 | pN557   | 87340  | CTX-M-14 | pST275 | N557   | ST11219 | <i>Homo sapiens</i> | 2010 | LC567075 |
| 173 | pN567   | 86970  | CTX-M-14 | pST275 | N567   | ST131   | <i>Homo sapiens</i> | 2010 | LC567076 |
| 174 | pN580   | 88656  | CTX-M-14 | pST275 | N580   | ST448   | <i>Homo sapiens</i> | 2010 | LC567077 |
| 175 | pN581   | 87307  | CTX-M-14 | pST275 | N581   | ST10    | <i>Homo sapiens</i> | 2010 | LC567078 |
| 176 | pN583   | 101632 | CTX-M-14 | pST322 | N583   | ST70    | <i>Homo sapiens</i> | 2010 | LC567079 |
| 177 | pN84    | 123379 | CTX-M-65 | pST71  | N84    | ST224   | <i>Homo sapiens</i> | 2010 | LC567064 |
|     |         |        |          |        |        |         | <i>Canis lupus</i>  |      |          |
| 178 | pP44    | 89476  | CTX-M-8  | pST113 | P44    | ST410   | <i>familiaris</i>   | 2015 | LC567053 |
| 179 | pHU485  | 86204  | CTX-M-8  | pST114 | N485   | ST23    | <i>Homo sapiens</i> | 2010 | LC567072 |

|     |        |        |         |        |      |        |                     |      |          |
|-----|--------|--------|---------|--------|------|--------|---------------------|------|----------|
| 180 | pHU493 | 94912  | CTX-M-8 | pST113 | N493 | ST1170 | <i>Homo sapiens</i> | 2010 | LC567073 |
| 181 | pHU590 | 91926  | CTX-M-8 | pST113 | N590 | ST2526 | <i>Homo sapiens</i> | 2010 | LC567080 |
| 182 | pCH41  | 89476  | CTX-M-8 | pST113 | S41  | ST351  | Chicken meat        | 2010 | LC567085 |
| 183 | pCH42  | 89147  | CTX-M-8 | pST113 | S42  | ST88   | Chicken meat        | 2010 | LC567086 |
| 184 | pCH49  | 89476  | CTX-M-8 | pST113 | S49  | ST224  | Chicken meat        | 2010 | LC567087 |
| 185 | pCH56  | 92049  | CTX-M-8 | pST113 | S56  | ST131  | Chicken meat        | 2010 | LC567088 |
| 186 | pCH110 | 97607  | CTX-M-8 | pST235 | S110 | ST4576 | Chicken meat        | 2010 | LC567091 |
| 187 | pCH365 | 108776 | CTX-M-8 | pST132 | S365 | ST602  | Chicken meat        | 2010 | LC567098 |
| 188 | pCH407 | 89476  | CTX-M-8 | pST113 | S407 | ST101  | Chicken meat        | 2010 | LC567099 |
| 189 | pN373  | 129994 | CTX-M-2 | pST12  | N373 | ST2223 | <i>Homo sapiens</i> | 2010 | LC567069 |
| 190 | pS241  | 129370 | CTX-M-2 | pST12  | S241 | ST602  | Chicken meat        | 2010 | LC567095 |

---

Table 3. Meta data of I1 plasmids carrying *bla*<sub>CTX-M</sub> genes

| No. | Plasmid        | Source                          | Geographic location | Collection year | <i>bla</i> CTX-M subtype | pMLST      |
|-----|----------------|---------------------------------|---------------------|-----------------|--------------------------|------------|
| 39  | Z247_p2474-3   | <i>Homo sapiens</i>             | China               | 2015            | CTX-M-55                 | pST167     |
| 42  | B              |                                 |                     |                 | CTX-M-55                 | pST16      |
| 43  | 545_pEC545_1   | <i>Homo sapiens</i>             | Viet Nam            | 2011            | CTX-M-15                 | pST16      |
| 44  | 403_unnamed1   | <i>Homo sapiens</i>             |                     |                 | CTX-M-15                 | pST31      |
| 45  | pESBL-EA11     |                                 |                     |                 | CTX-M-15                 | pST31      |
| 61  | pSF-468-2      | <i>Homo sapiens</i>             | USA                 | 2010            | CTX-M-14                 | pST166     |
| 74  | pCREC-591_1    | <i>Homo sapiens</i>             | South Korea         | 2015            | CTX-M-123                | pST108     |
| 82  | 369_unnamed3   |                                 |                     |                 | CTX-M-15                 | pSTUT01    |
| 102 | pESBL-283      | <i>Sus scrofa</i>               |                     |                 | CTX-M-1                  | pST7       |
| 103 | pESBL-305      | <i>Gallus gallus domesticus</i> |                     |                 | CTX-M-1                  | pST3       |
| 104 | pESBL-315      | <i>Gallus gallus domesticus</i> |                     |                 | CTX-M-1                  | pSTUnknown |
| 105 | p369           | <i>Gallus gallus domesticus</i> |                     |                 | CTX-M-1                  | pST3       |
| 106 | pIFM3804       | <i>Sus scrofa</i>               | UK                  | 2009            | CTX-M-1                  | pST108     |
| 107 | pC49-108       | <i>Gallus gallus domesticus</i> | Switzerland         | 2013            | CTX-M-1                  | pST3       |
| 108 | pC59-112       | <i>Gallus gallus domesticus</i> | Switzerland         | 2013            | CTX-M-1                  | pST3       |
| 109 | pC60-108       | <i>Gallus gallus domesticus</i> | Switzerland         | 2013            | CTX-M-1                  | pST3       |
| 110 | pH18-Hel20-TF1 |                                 | Denmark             |                 | CTX-M-1                  | pST49      |
| 111 | pH1519-88      | <i>Homo sapiens</i>             | Switzerland         | 2013            | CTX-M-1                  | pST145     |
| 112 | pH2291-112     | <i>Homo sapiens</i>             | Switzerland         | 2013            | CTX-M-1                  | pST3       |

|     |              |                                 |             |      |          |        |
|-----|--------------|---------------------------------|-------------|------|----------|--------|
| 113 | pHV114       | <i>Gallus gallus domesticus</i> | Switzerland | 2013 | CTX-M-1  | pST3   |
| 114 | pHV292       | <i>Gallus gallus domesticus</i> | Switzerland | 2013 | CTX-M-1  | pST3   |
| 115 | pHV295       | <i>Gallus gallus domesticus</i> | Switzerland | 2013 | CTX-M-1  | pST3   |
| 116 | pTCN40607    | <i>Gallus gallus domesticus</i> | USA         | 2012 | CTX-M-1  | pST3   |
| 117 | pCTXM1-MU2   | <i>Sus scrofa</i>               | Australia   |      | CTX-M-1  | pST3?* |
| 118 | pTF2         |                                 | Denmark     | 2007 | CTX-M-1  | pST49  |
| 119 | pEK204       |                                 |             |      | CTX-M-3  | pST16  |
| 120 | pESBL-12     | <i>Homo sapiens</i>             |             |      | CTX-M-15 | pST37  |
| 121 | pEC-Bactec   | <i>Equus caballus</i>           | Belgium     |      | CTX-M-15 | pST31  |
| 122 | pFAM22871-2  |                                 |             |      | CTX-M-15 | pST37  |
| 123 | pHUSEC2011-1 | <i>Homo sapiens</i>             | Germany     | 2011 | CTX-M-15 | pST31? |
| 124 | pSH4469      | <i>Homo sapiens</i>             | Korea       | 2008 | CTX-M-15 | pST16  |
| 125 | pSPA440915   | <i>Homo sapiens</i>             |             |      | CTX-M-15 | pST31  |
| 126 | pSKLX3330    | <i>Homo sapiens</i>             | China       |      | CTX-M-55 | pST16  |
| 127 | p628-CTXM    | <i>Homo sapiens</i>             | China       | 2010 | CTX-M-55 | pST16  |
| 128 | pV404        | <i>Homo sapiens</i>             | Bolivia     |      | CTX-M-14 | pST107 |
| 129 | pUR-EC07     | <i>Homo sapiens</i>             | Uruguay     |      | CTX-M-14 | pST80  |
| 130 | pC193        |                                 | Bolivia     | 2011 | CTX-M-65 | pST71  |
| 131 | pC271        |                                 | Bolivia     | 2011 | CTX-M-65 | pST71  |
| 132 | pEC012       | <i>Gallus gallus domesticus</i> | China       |      | CTX-M-65 | pST71  |
| 133 | pM105        | <i>Homo sapiens</i>             | Bolivia     | 2011 | CTX-M-65 | pST71  |
| 134 | pV408        | <i>Homo sapiens</i>             | Bolivia     | 2011 | CTX-M-65 | pST71  |

|     |                  |                                 |         |      |           |        |
|-----|------------------|---------------------------------|---------|------|-----------|--------|
| 135 | pEC1333          | sewage                          | Brazil  | 2009 | CTX-M-8   | pST113 |
| 136 | pLV23529-CTX-M-8 | <i>Sus scrofa</i>               | Portuga | 2015 | CTX-M-8   | pST113 |
| 137 | pN23             | <i>Homo sapiens</i>             | Japan   |      | CTX-M-8   | pST113 |
| 138 | pS11             | chicken meat                    | Japan   |      | CTX-M-8   | pST113 |
| 139 | pHNAH4-1         | <i>Gallus gallus domesticus</i> |         |      | CTX-M-123 | pST108 |
| 140 | pCTXM123         |                                 | China   |      | CTX-M-123 | pST108 |

---

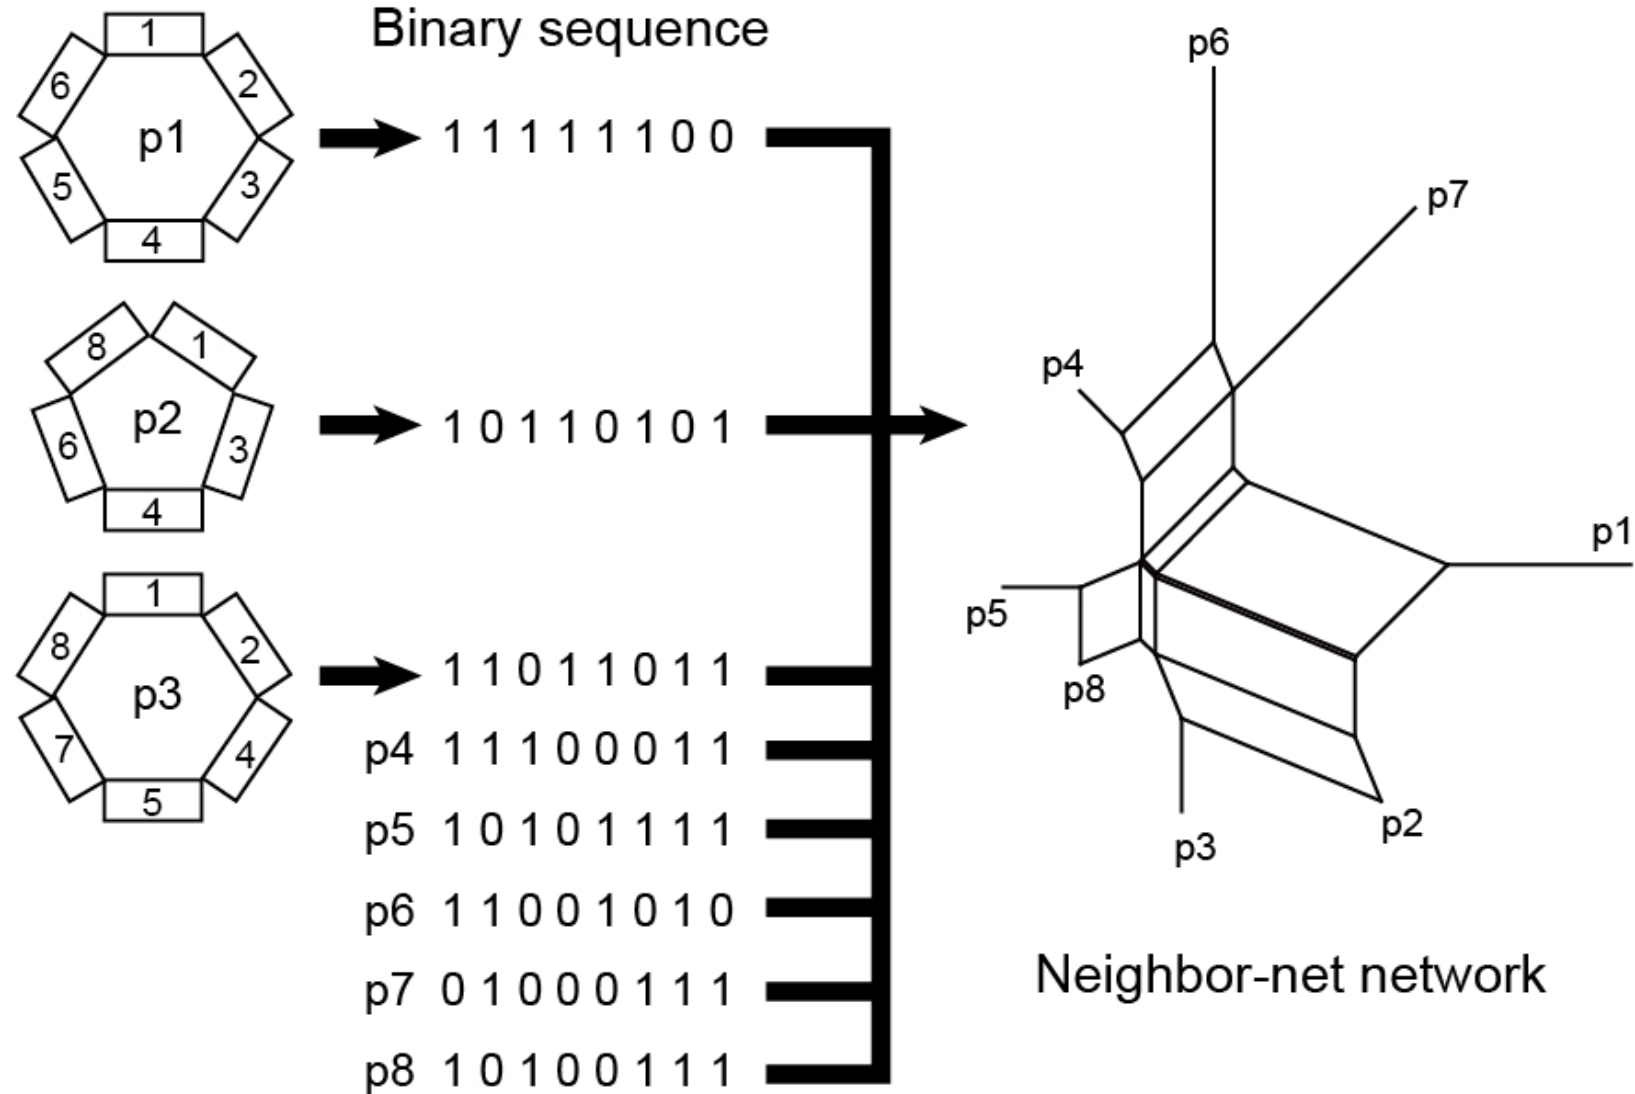

Figure 1  
Outline of OSNAp analysis. Plasmid sequences (p1 – p3) are broken down into ORFs (1 – 8) and binarized based on the presence of ORFs. Phylogenetic relationships among plasmids are depicted as neighbor-net network based on the distance matrix of the binary sequences. ORF contents of plasmid 4 to 8 (p4 – p8) are omitted.
